# Supplementary material for: Mutant IDH1 Dysregulates the Differentiation of Mesenchymal Stem Cells in Association with Gene-Specific Histone Modifications to Cartilage- and Bone-Related Genes
Source: PubMed Central journal article supplement (PMC4498635; doi:10.1371/journal.pone.0131998), 2015-07-10
Supplement: pone.0131998.s001.pdf [file pone.0131998.s001.pdf]

*IDH1*

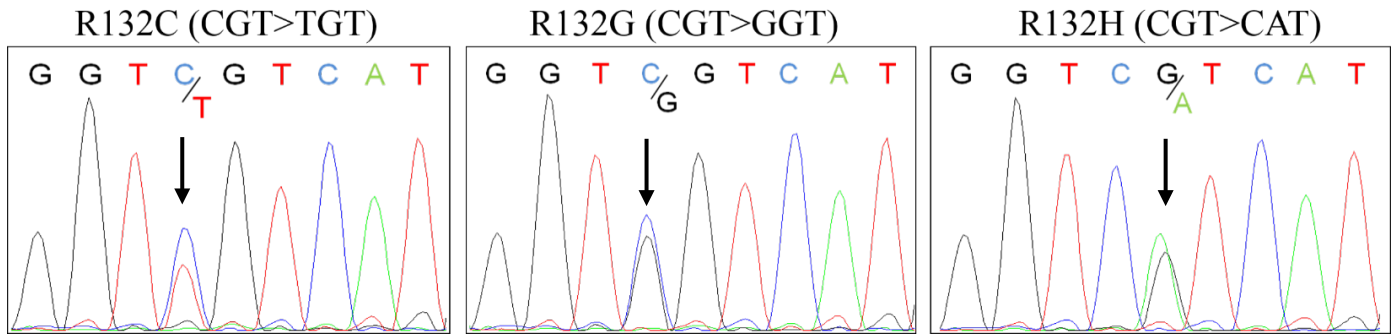

*IDH2*

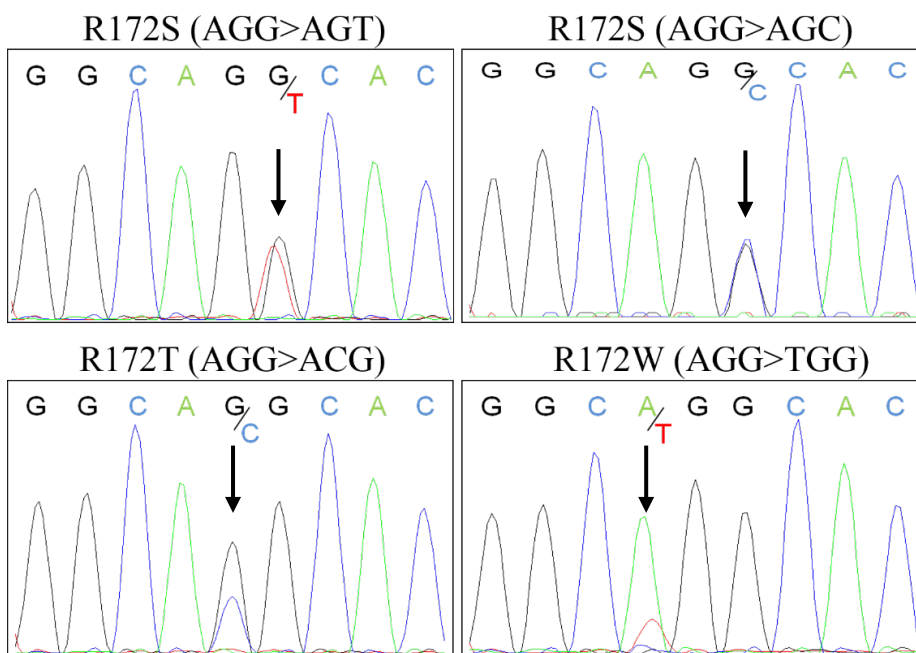

**Figure S1. *IDH1/2* mutations in cartilaginous tumors.**

Three types of *IDH1* mutations (R132C, R132G, R132H) and three types of *IDH2* mutations (R172S, R172T, R172W) were detected in 77 cartilaginous tumors.
