# Supplementary material for: Mutant IDH1 Dysregulates the Differentiation of Mesenchymal Stem Cells in Association with Gene-Specific Histone Modifications to Cartilage- and Bone-Related Genes
Source: PubMed Central journal article supplement (PMC4498635; doi:10.1371/journal.pone.0131998), 2015-07-10
Supplement: pone.0131998.s002.pdf [file pone.0131998.s002.pdf]

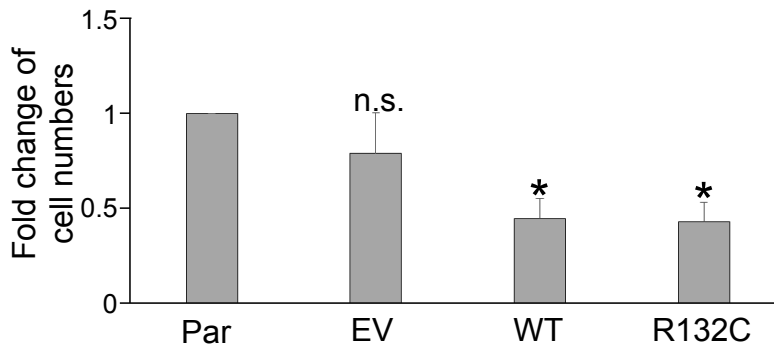

**Figure S2. The proliferation of hMSCs expressing *IDH1* WT or R132C.** Each hMSC (Par, EV, WT, or R132C, as described in legend for Figure 1) were plated in 96-well plates at 1000 cells per well. At 1 day and 8 days after plating, the cell numbers in triplicate wells were measured as the absorbance at 450 nm of reduced CCK-8. The fold change of cell numbers was calculated by fold change of the absorbance in 7 days. Data are shown as a value related to that of parental cells. \*,  $p < 0.05$ , by Dunnett's multiple comparisons test compared to the parental cells.
