# Supplementary material for: Mutant IDH1 Dysregulates the Differentiation of Mesenchymal Stem Cells in Association with Gene-Specific Histone Modifications to Cartilage- and Bone-Related Genes
Source: PubMed Central journal article supplement (PMC4498635; doi:10.1371/journal.pone.0131998), 2015-07-10
Supplement: pone.0131998.s004.pdf [file pone.0131998.s004.pdf]

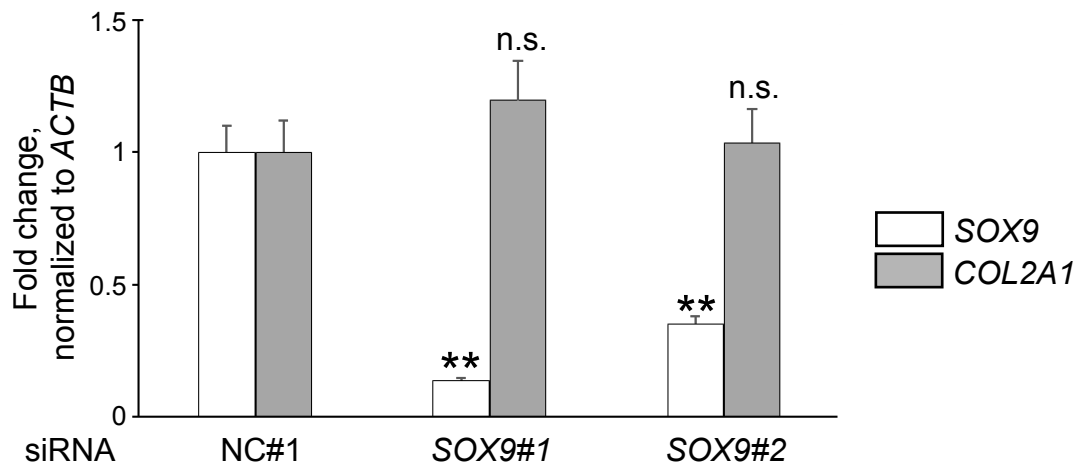

#### **S4. The knock-down of SOX9 gene in IDH1 R132C hMSCs.**

hMSCs expressing *IDH1* R132C were treated with siRNA targeting the *SOX9* gene for 48 hours, and the expression of the *SOX9* gene as well as the expression of *COL2A1* gene was analyzed by qPCR. Two different siRNA targeting the *SOX9* gene were used. \*\*,  $p < 0.01$  by Dunnett's multiple comparisons test compared to cells treated with control siRNA (NC#1)
