# Supplementary material for: Mutant IDH1 Dysregulates the Differentiation of Mesenchymal Stem Cells in Association with Gene-Specific Histone Modifications to Cartilage- and Bone-Related Genes
Source: PubMed Central journal article supplement (PMC4498635; doi:10.1371/journal.pone.0131998), 2015-07-10
Supplement: pone.0131998.s005.pdf [file pone.0131998.s005.pdf]

**Table S1. Primer sequences used in qRT-PCR**

| Target gene    | Accession No. | Primer Sequences          |                        | product size |
|----------------|---------------|---------------------------|------------------------|--------------|
|                |               | Sense                     | Antisense              |              |
| <i>SOX9</i>    | NM_000346     | AGCAAAGGAGATGAAATCTGTTCTG | AGGTAACTGCTGGTGTCTGAGA | 151bp        |
| <i>COL2A1</i>  | NM_001844     | GGCAATAGCAGGTTACGTACA     | CGATAACAGTCTTGCCCCACTT | 79bp         |
| <i>ALPL</i>    | NM_000478     | CCTCCTCGGAAGACACTCTG      | GCAGTGAAGGGCTTCTTGTC   | 139bp        |
| <i>COMP</i>    | NM_000095     | AGGGAGATCGTGCAGACAA       | AGCTGGAGCTGTCCTGGTAG   | 154bp        |
| <i>ACAN</i>    | NM_013227     | TGAGTCCTCAAGCCTCCTGT      | TGGTCTGCAGCAGTTGATTTC  | 129bp        |
| <i>COL10A1</i> | NM_000493     | AATGCCACAGGCATAAAAG       | AGGACTTCCGTAGCCTGGTT   | 187bp        |
| <i>RUNX2</i>   | NM_001024630  | TTACTTACACCCCGCCAGTC      | TATGGAGTGCTGCTGGTCTG   | 139bp        |
| <i>OSX</i>     | NM_001173467  | GCCAGAAGCTGTGAAACCTC      | GCTGCAAGCTCTCCATAACC   | 161bp        |
| <i>COL1A1</i>  | NM_000088     | GTGCTAAAGGTGCCAATGGT      | ACCAGGTTACCCGCTGTTAC   | 128bp        |
